# Supplementary material for: Immune checkpoint inhibitor-induced colitis is mediated by CXCR6+ polyfunctional lymphocytes and is dependent on the IL23/IFNγ axis
Source: Research Square preprint supplement (doi:10.21203/rs.3.rs-1249584/v1), 2022-01-20
Supplement: Supplementary file 1 [file e20f865f0addd0807ea35d2a.pdf]

## Supplementary Figures

### Supplementary Figure 1

A

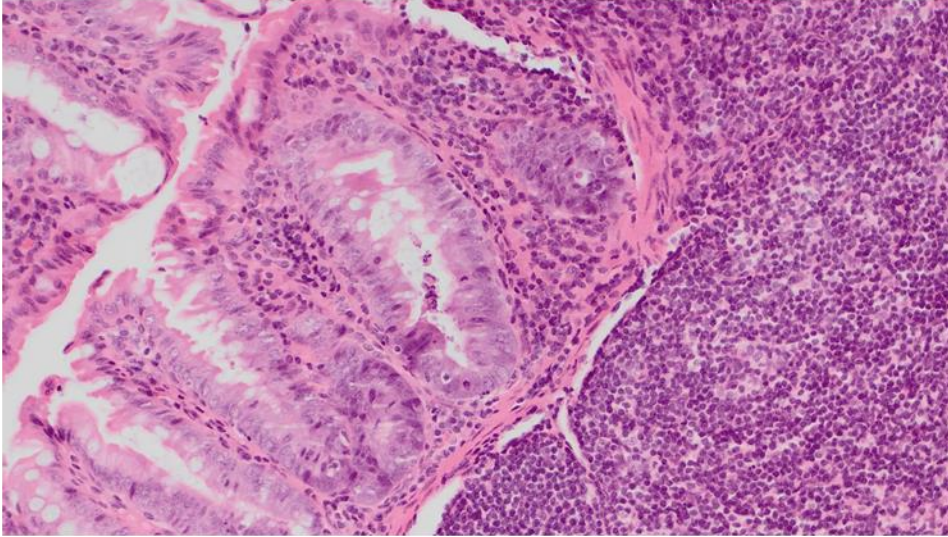

B

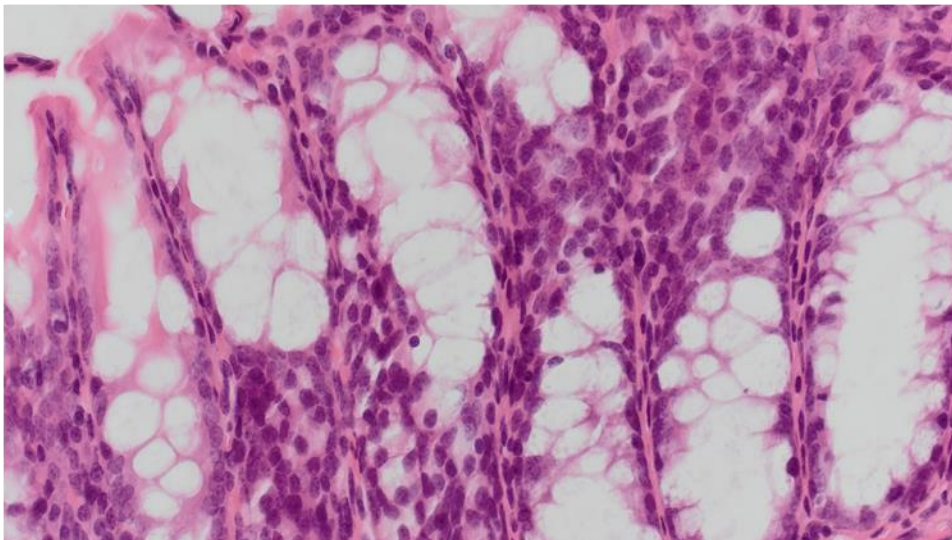

**Supplementary Figure 1. Further histological evidence showing marked crypt apoptosis and increased lymphocyte infiltration in CPI-induced colitis mice**

(A) Marked crypt apoptosis and (B) lymphocyte infiltration of the lamina propria in mice treated with combination anti-CTLA/anti-PD-1 therapy and FMT.

Supplementary Figure 2

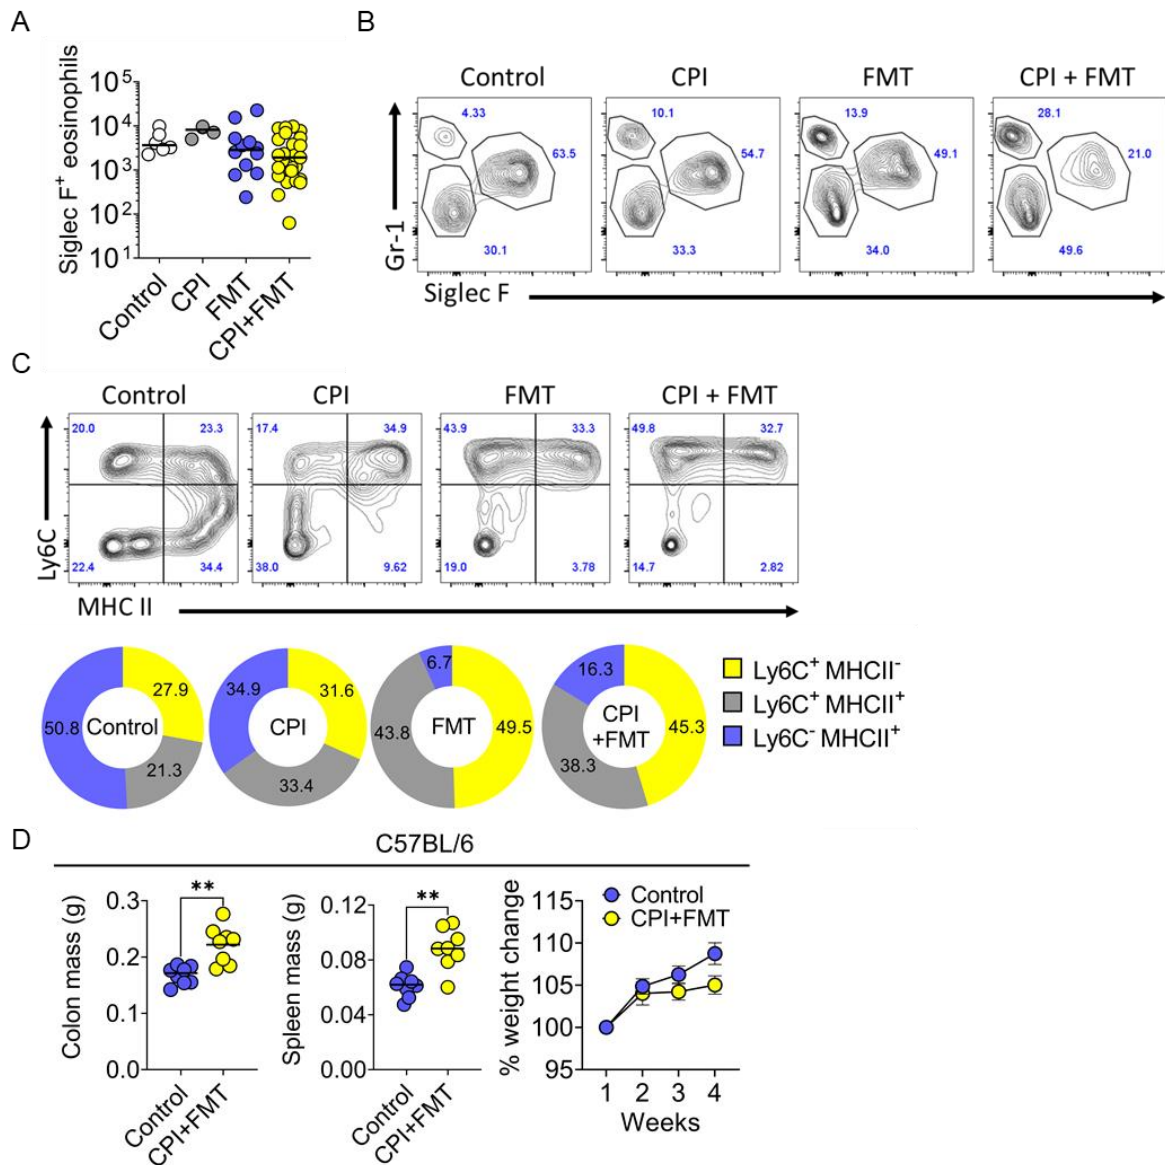

**Supplementary Figure 2. The intestinal microbiota regulates susceptibility to immune checkpoint inhibitor-induced colitis**

(A) Number of Siglec F<sup>+</sup> eosinophils and (B) representative flow cytometry contour plots showing neutrophils (Gr-1<sup>+</sup> SiglecF<sup>-</sup>) and eosinophils (Gr-1<sup>-</sup> SiglecF<sup>+</sup>) (pre-gated on live CD45<sup>+</sup> CD11b<sup>+</sup>) in the lamina propria of the colon in wildtype Balb/C mice without treatment (control, n=6), treatment with combination anti-CTLA4/anti-PD-1 (CPI, n=3), treatment with faecal microbiota (FMT, n=13) and mice treated with both CPI and FMT (n=54). (C)

Representative flow cytometry contour plots and the overall ratio of infiltrating monocytes (Ly6C<sup>+</sup> MHCII<sup>-</sup>), transitioning monocytes (Ly6C<sup>+</sup> MHCII<sup>+</sup>) and resident macrophages (Ly6C<sup>-</sup> MHCII<sup>+</sup>) (pre-gated on live CD45<sup>+</sup> CD11b<sup>+</sup> Gr-1<sup>-</sup> SiglecF<sup>-</sup>) present in the lamina propria of wildtype control mice (n=6), mice with only CPI treatment (n=6), mice given only FMT (n=6) and mice treated with both CPI and FMT (n=6). (D) Colon mass, spleen mass and the percentage weight change between untreated C56BL/6 mice (n=8) and C56BL/6 mice treated with both CPI and FMT (n=8). \*\* P <0.005 with two-sided Mann-Whitney U Test.

Supplementary Figure 3

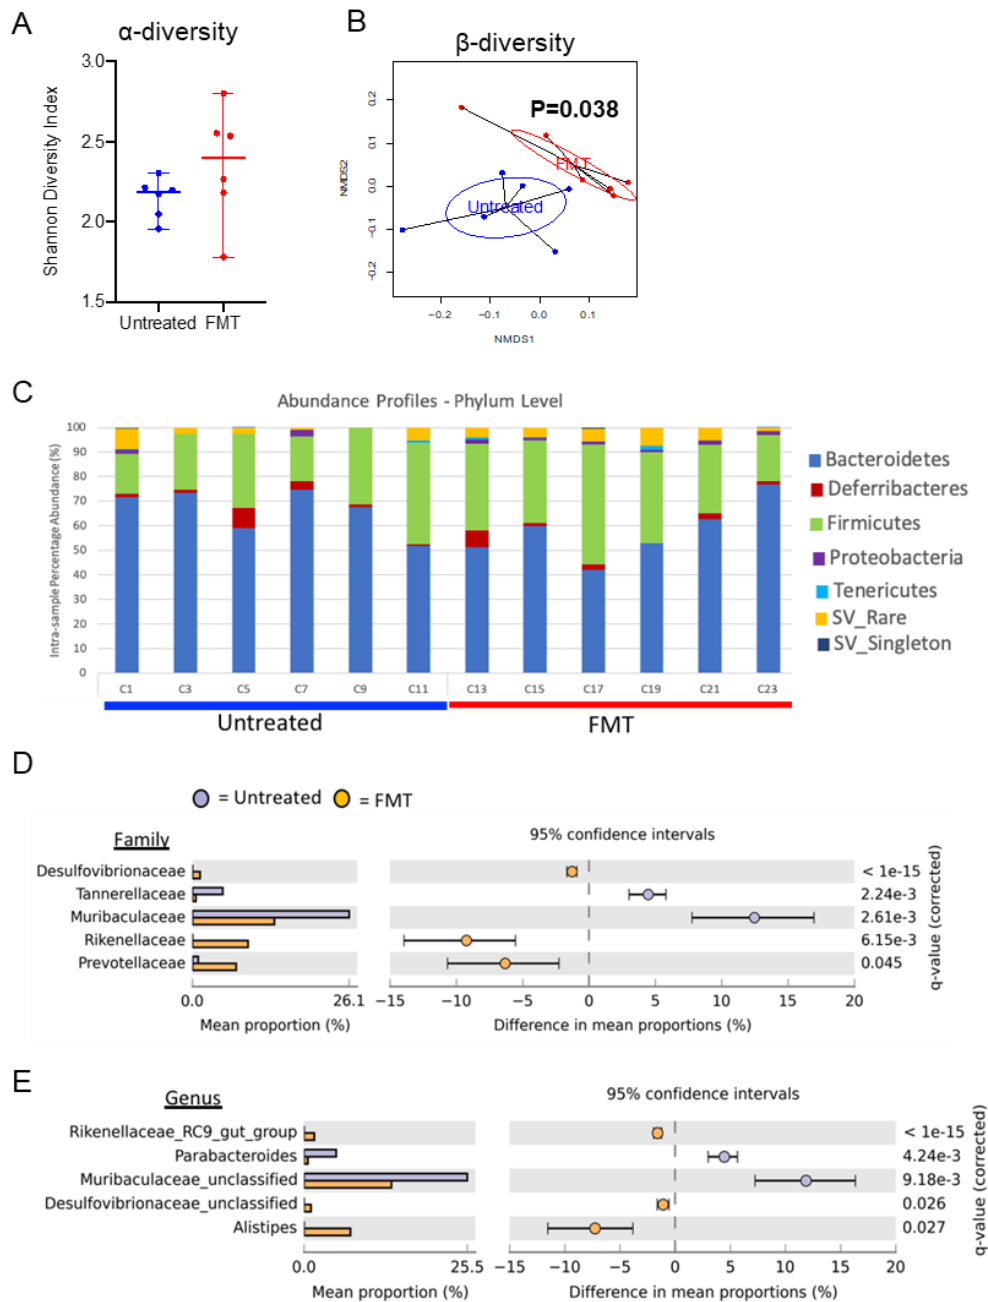

**Supplementary Figure 3: Faecal microbiota transplantation alters the community composition of the intestinal microbiota**

(A) Alpha diversity (Shannon diversity index) of the microbiota between untreated control Balb/C WT (n=6) and Balb/C WT treated with FMT (n=6). (B) Non-metric dimensional scaling plot showing the beta diversity of the microbiota from untreated control Balb/C WT (n=6) and Balb/C WT treated with FMT (n=6). (C) Phylum level relative abundance profiles for untreated

control Balb/C WT (n=6) and Balb/C WT treated with FMT (n=6). (D) Extended error bar plot, with bacterial family changes statistically assessed by White's non-parametric t-test with Benjamini-Hochberg correction, using threshold of differences between mean proportions >1% between untreated control Balb/C WT (n=6) and Balb/C WT treated with FMT (n=6). (E) Extended error bar plot, with bacterial genus statistically significant changes measured by White's non-parametric t-test with Benjamini-Hochberg correction, using threshold of differences between mean proportions >1% between untreated control Balb/C WT (n=6) and Balb/C WT treated with FMT (n=6).

Supplementary Figure 4

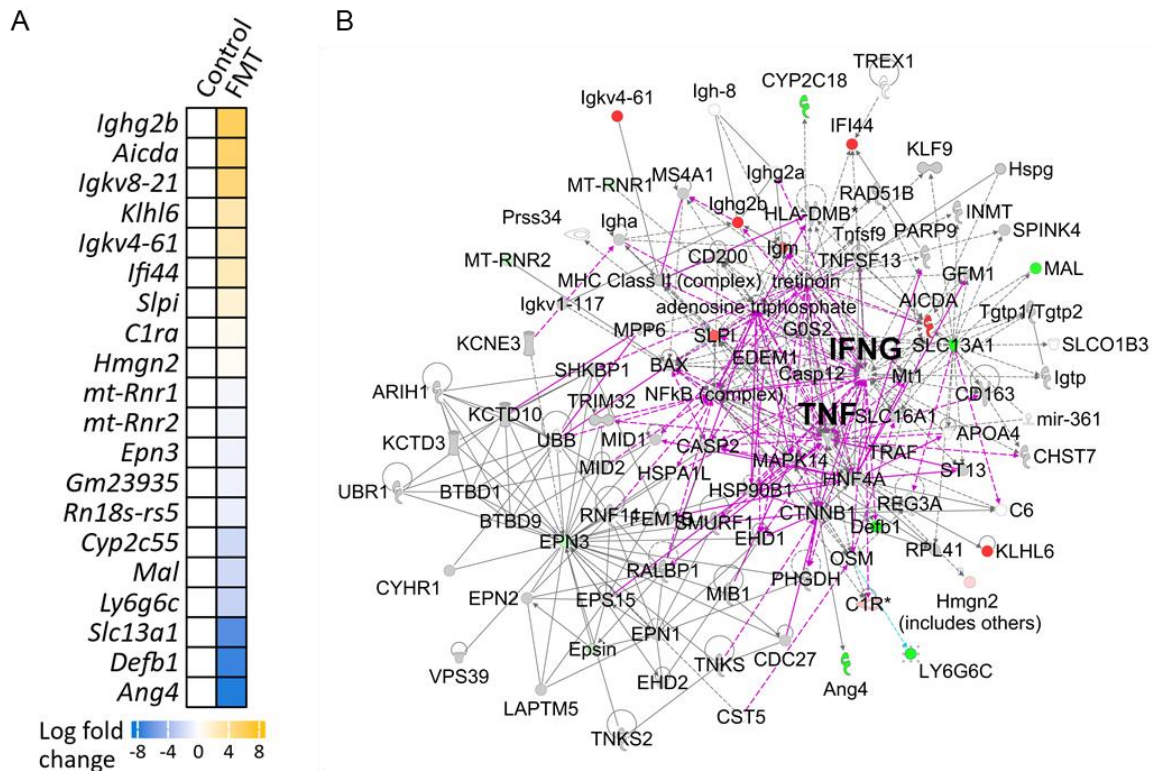

**Supplementary Figure 4: Gene expression changes in the colon of WT mice following FMT**

RNA was extracted from the distal colon of WT mice following gavage with a pro-inflammatory microbiota, harvested from TRUC mice and RNA sequencing performed. (A) DEGs (FDR<0.05) in the colon of WT mice following FMT (n=3) in comparison with control mice (n=4). (B) The only 3 mechanistic networks associated with the gene expression changes occurring in FMT recipients in comparison with control mice were merged to form a single network (IPA, QIAGEN).



## A

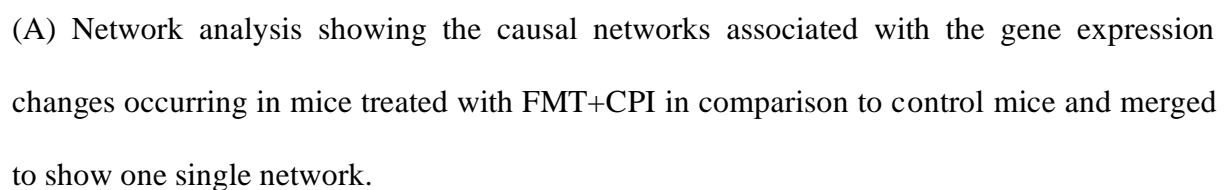

Supplementary Figure 6

A

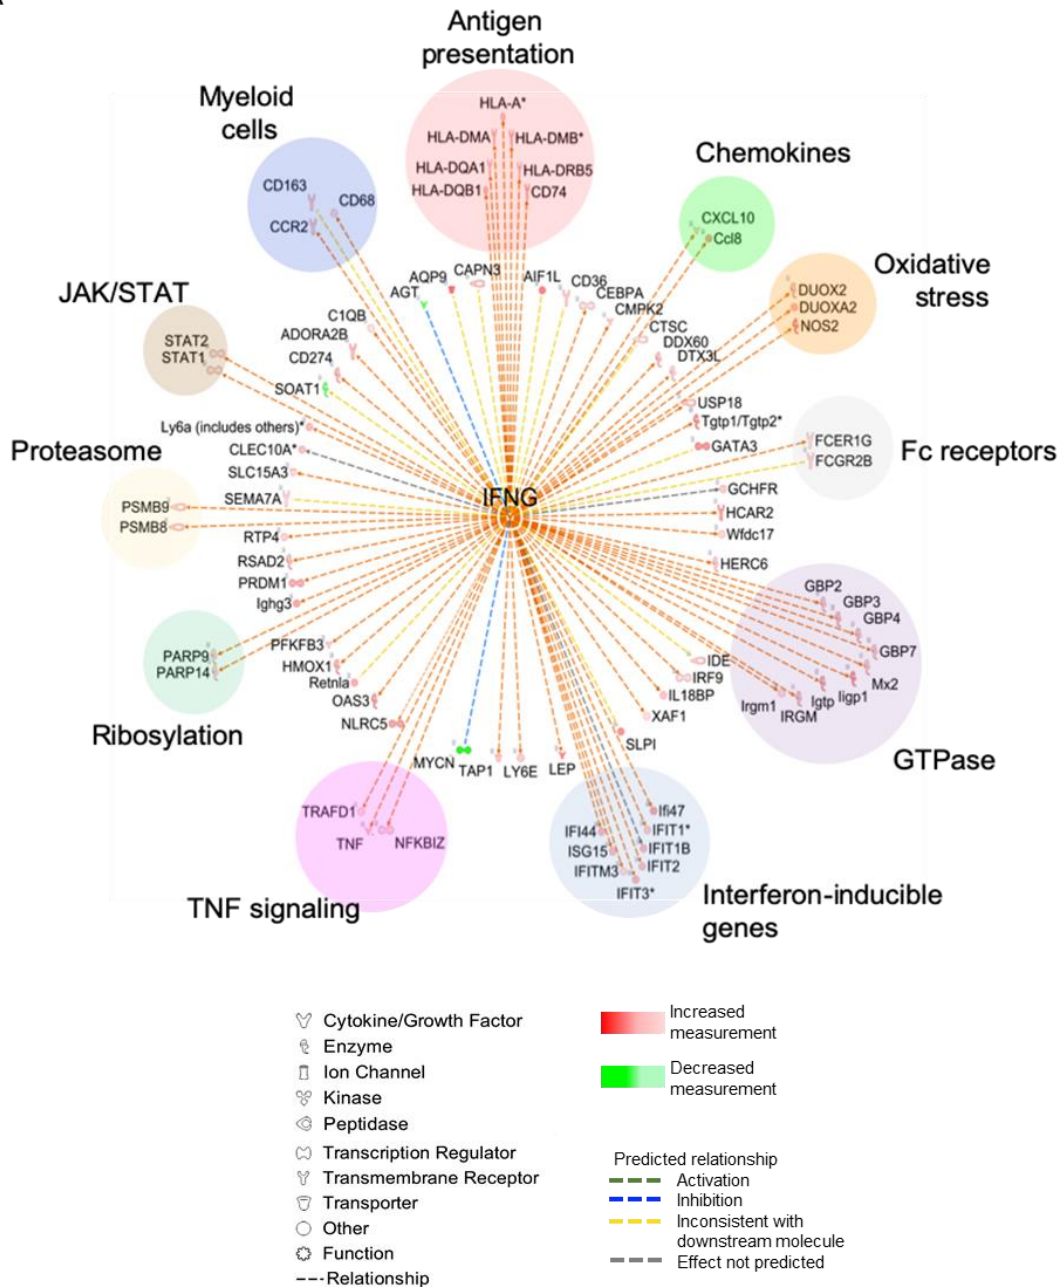

**Supplementary Figure 6: Network analysis of *Ifng* interactions with other differentially expressed genes in WT mice following FMT+CPI**

(A) Network analysis of annotated *Ifng* interactions with CPI-induced colitis DEGs showed effects on many biological processes, such as antigen presentation, oxidative stress, chemokine induction, JAK/STAT signalling, and proteasome activation.



## Supplementary Figure 7

A

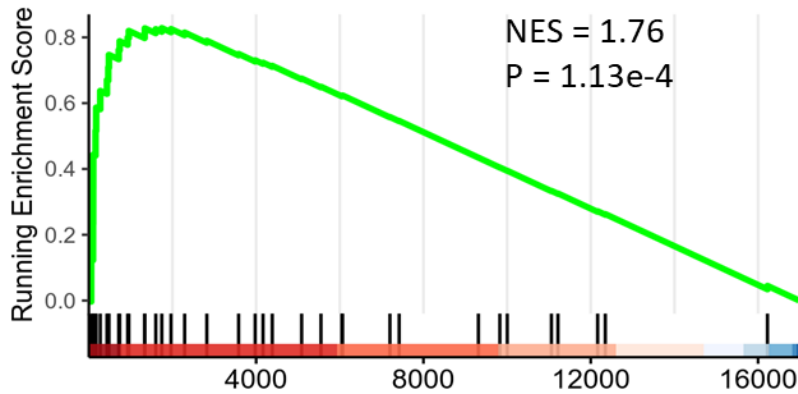

### Supplementary Figure 7: Link between transcriptional features of CPI-induced colitis in human and mouse

(A) GSEA results for the mouse homologs of the most significantly up-regulated genes in colon biopsies from patients affected by CPI-induced colitis. 32 human genes significantly up-regulated in CPI-induced colitis ( $\log$  fold change  $> 1$  and  $\text{FDR} < 0.05$ ) were identified through differential expression analysis of a previously published dataset focusing on the nCounter PanCancer Immune Profiling Panel. The gene signature consisted of all their 39 mouse homologs expressed in WT mice ( $n=4$ ) and in mice treated with FMT and anti-CTLA4/anti-PD-1 combination therapy ( $n=3$ ). The mouse genes were ranked based on the estimated expression log fold changes between these conditions, using the control as reference. NES: Normalised Enrichment Score, P: P-value of the gene set enrichment test.

Supplementary Figure 8

A

All clusters

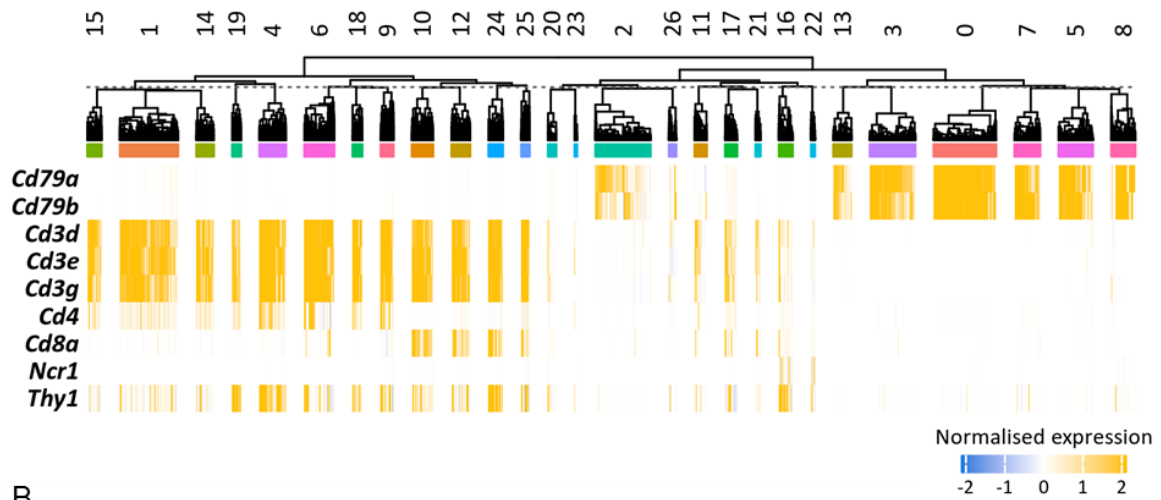

B

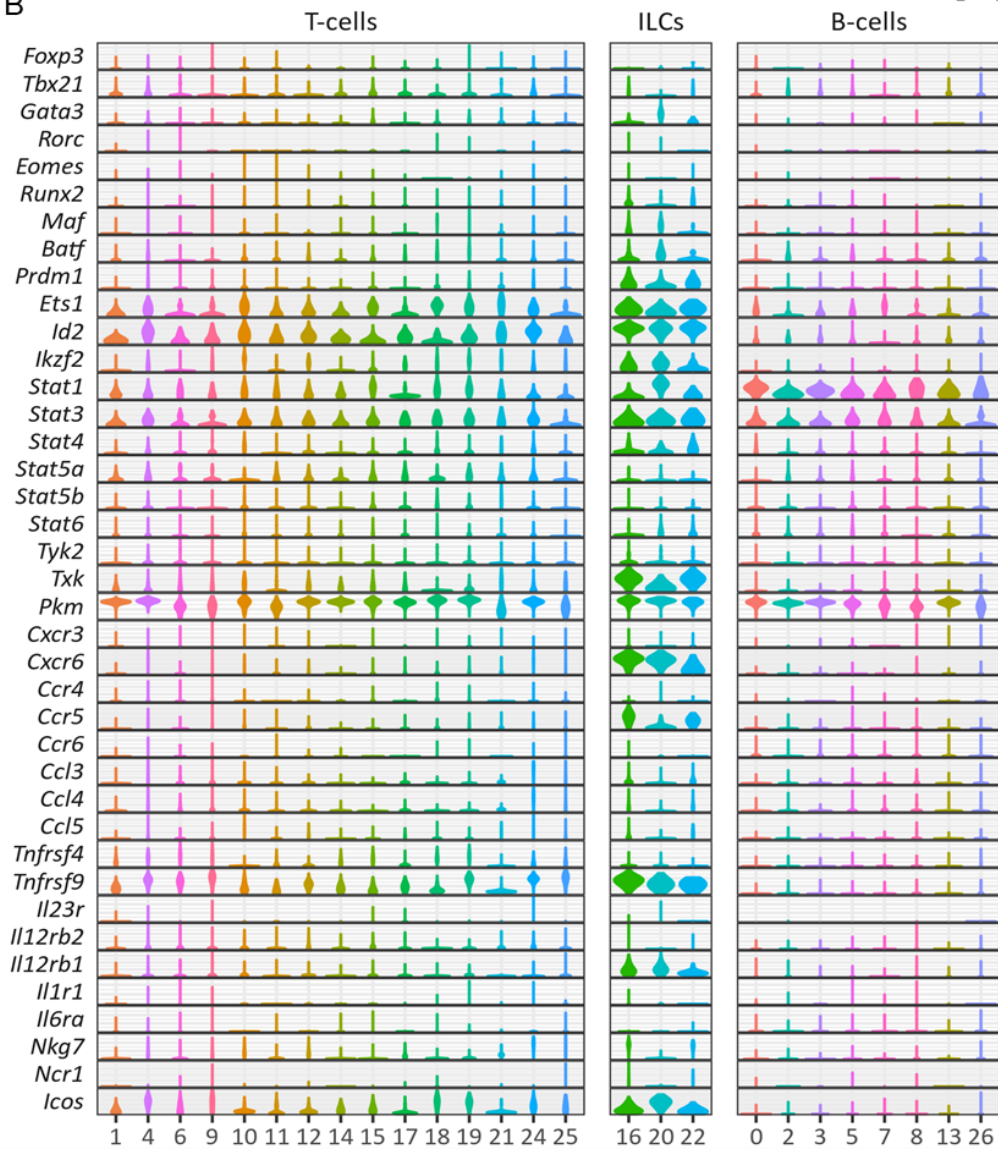

**Supplementary Figure 8: Single cell RNA-seq analysis of different immune compartments reveals that IFN $\gamma$  is a key cytokine in CPI-induced colitis**

(A) Heatmap of normalised gene expression levels of different surface markers across the 27 lymphocyte populations identified in the control samples (n=3) used in this study. (B) Violin plots of normalised gene expression levels of different transcription factors, kinases, chemokine receptors and chemokines in the T cells, B cells and ILC clusters.

Supplementary Figure 9

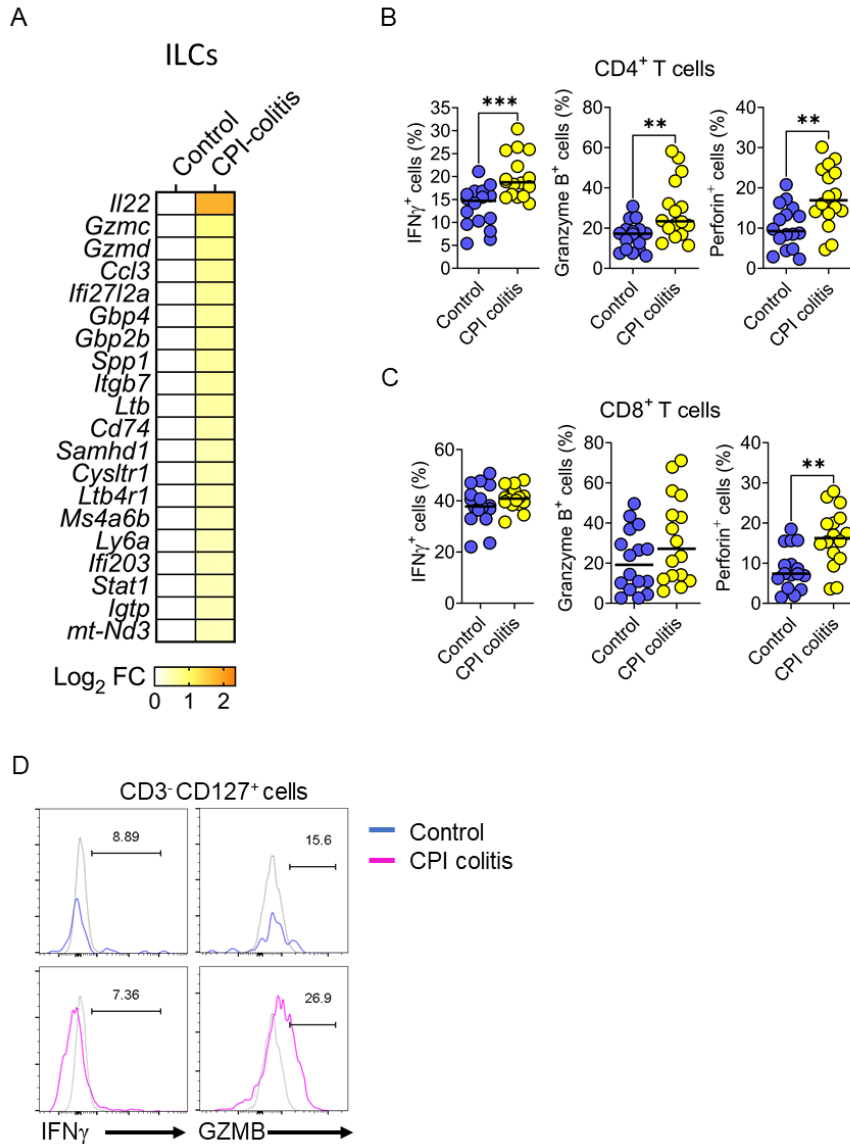

**Supplementary Figure 9: Cytotoxic profile by flow cytometry of CD4<sup>+</sup> and CD8<sup>+</sup> T-cells**

(A) Heatmap of cytokine and chemokine expression shown by log<sub>2</sub> fold changes between CPI-induced colitis (n=3) and control samples (n=4) in colonic ILC clusters. (B) Dot plots from flow cytometry data showing the proportions of IFN $\gamma$ , granzyme B and perforin producing CD4<sup>+</sup> and (C) CD8<sup>+</sup> T cells in WT mice (n=16) and in mice treated with FMT and CPI (n=16). Representative flow cytometry histograms showing the percentage of IFN $\gamma$  and granzyme B expressing CD3<sup>-</sup> CD127<sup>+</sup> cells in mice with CPI-induced colitis (n=16) and control mice (n=16).

## Supplementary Figure 10

A

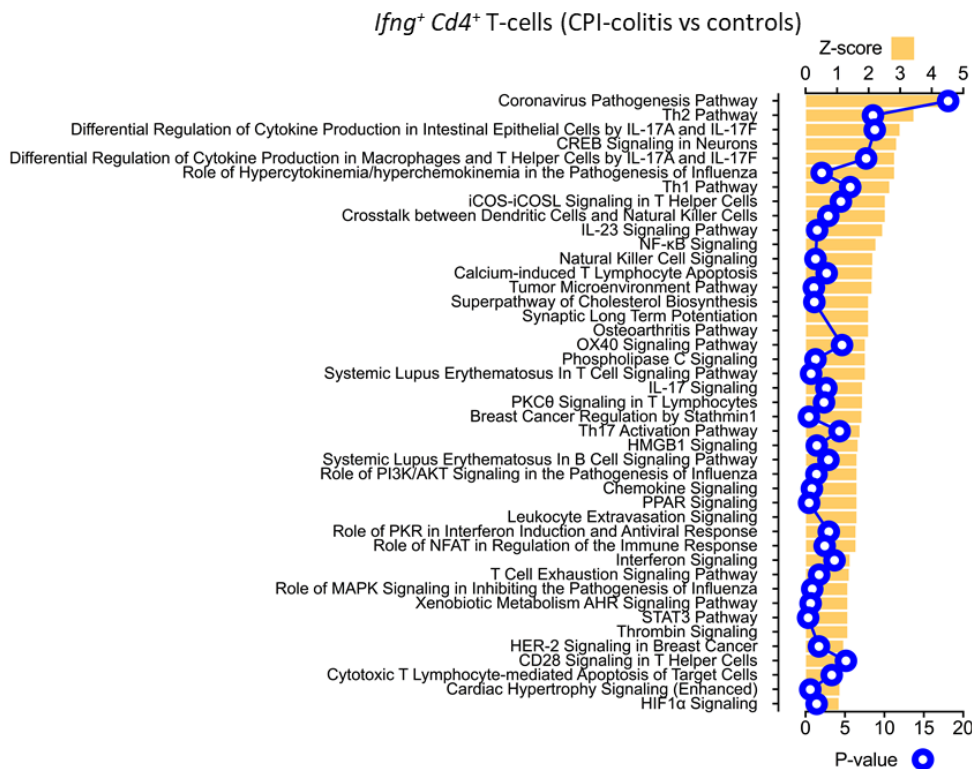

B

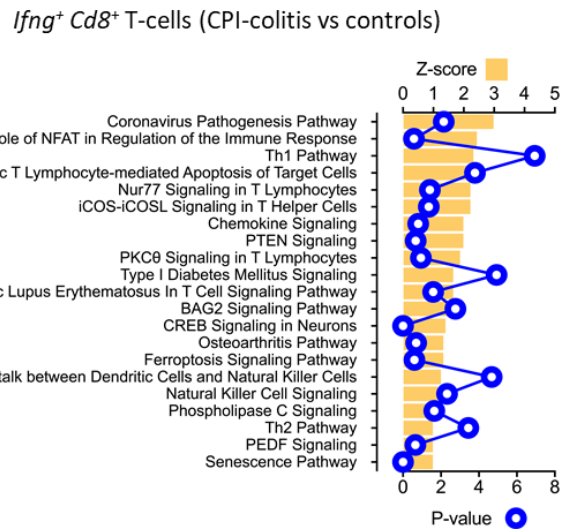

### Supplementary Figure 10: Canonical pathways activated in *Ifng*<sup>+</sup> CD4<sup>+</sup> and CD8<sup>+</sup> T cells

(A) Canonical pathways activated (Z-score >1) in *Ifng*<sup>+</sup> CD4<sup>+</sup> and (B) CD8<sup>+</sup> T cells in CPI colitis (n=3) vs controls (n=4).



Supplementary Figure 11

A

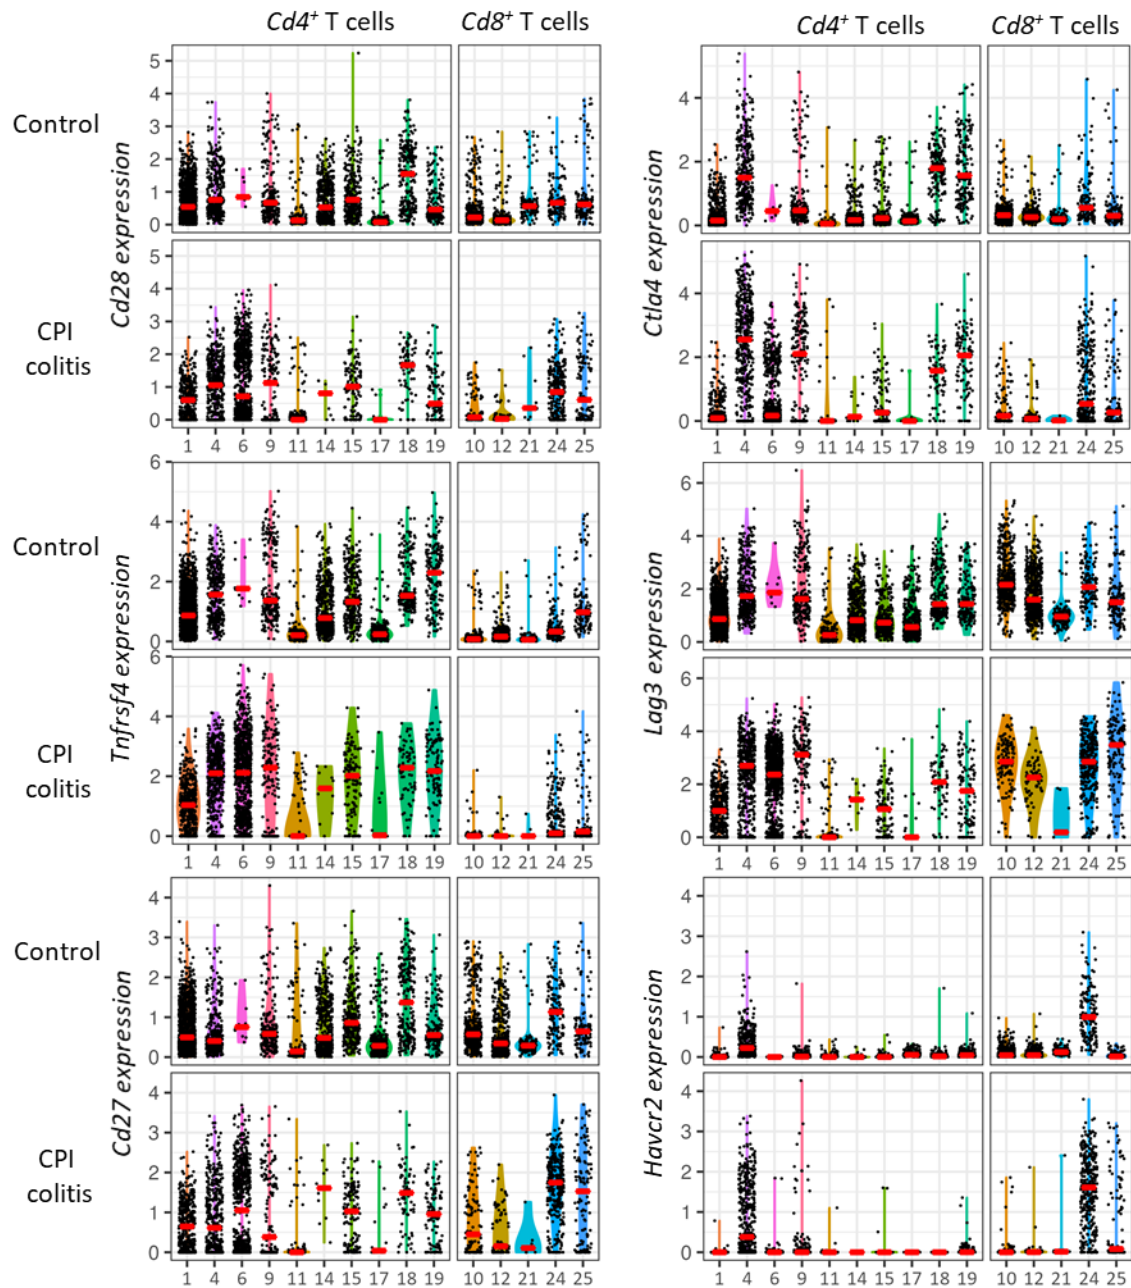

**Supplementary Figure 11: Violin plots showing expression of different checkpoint genes in the CD4<sup>+</sup> and CD8<sup>+</sup> T cell clusters from the single cell RNA-seq dataset**

(A) Violin plots showing the expression levels of checkpoint genes across CD4<sup>+</sup> and CD8<sup>+</sup> T cell clusters in mice with CPI-induced colitis.

Supplementary Figure 12

A

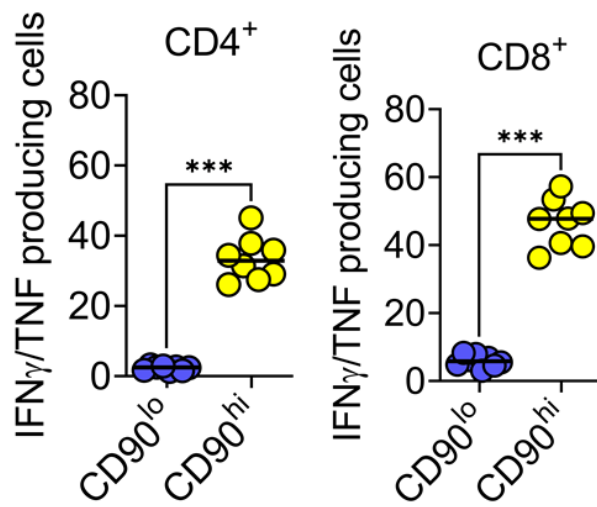

**Supplementary Figure 12: CD90<sup>hi</sup> CD4<sup>+</sup> and CD8<sup>+</sup> show increased polyfunctional cytotoxic cytokines in CPI-induced colitis**

(A) Summary statistics showing intracellular IFN $\gamma$ /TNF $\alpha$  in CD4<sup>+</sup> and CD8<sup>+</sup> T cells in the colon in mice treated FMT+CPI. Cells were stimulated with PMA/ionomycin \*\*\* P < 0.001 two sided Mann-Whitney U test.

Supplementary Figure 13

A

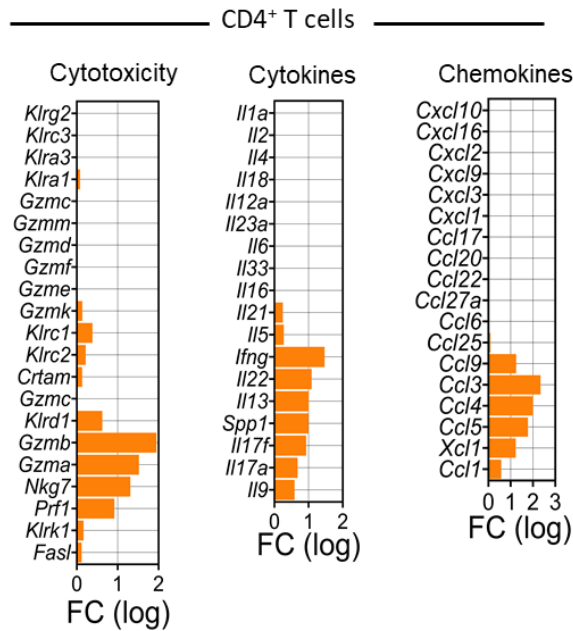

B

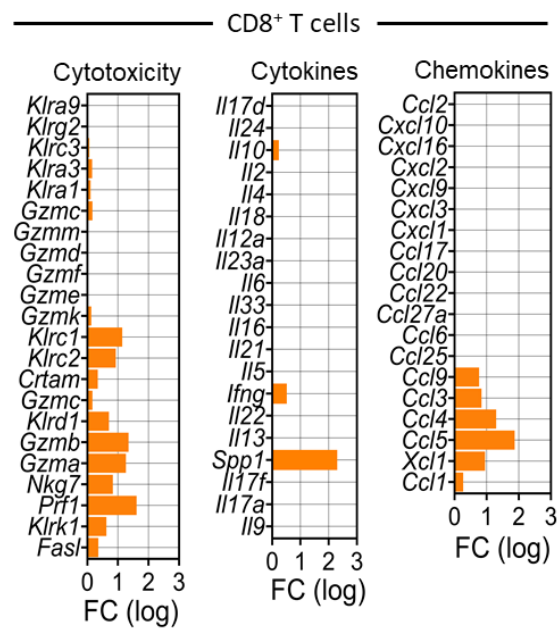

**Supplementary Figure 13: IFN $\gamma$ <sup>+</sup> CD4<sup>+</sup> and CD8<sup>+</sup> T cells have increased expression of cytotoxic genes**

(A) Bar graph of expression levels of significantly expressed cytotoxic, cytokines and chemokines genes in IFN $\gamma$ <sup>+</sup> CD4<sup>+</sup> T cell clusters and (B) CD8<sup>+</sup> T cell clusters compared to IFN $\gamma$ <sup>-</sup> clusters.

Supplementary Figure 14

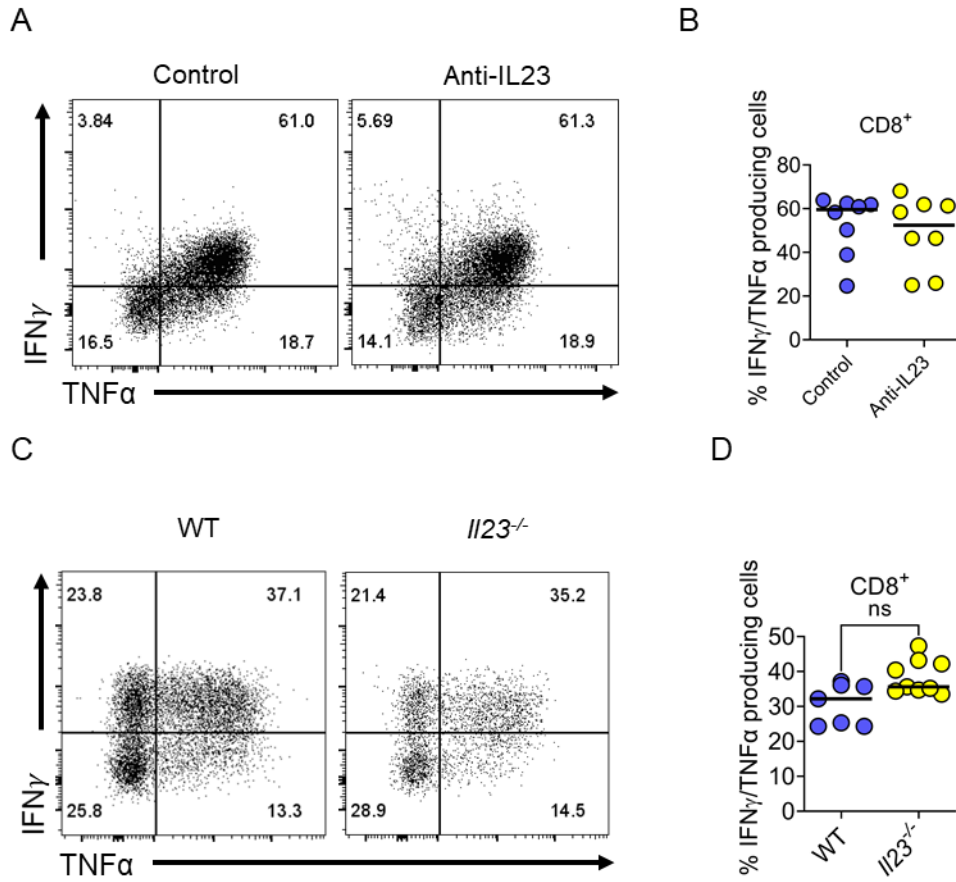

**Supplementary Figure 14: CD8<sup>+</sup> T cells remain unaffected by blockade or deletion of IL23**

(A) Representative flow cytometry plot and (B) percentage of IFN $\gamma$ <sup>+</sup>/TNF $\alpha$ <sup>+</sup> CD8<sup>+</sup> T cells from CPI-colitis mice treated with an isotype control (n=7) or an IL-23 blocking antibody (n=8). (C) Representative flow cytometry plot and (D) percentage of IFN $\gamma$ <sup>+</sup>/TNF $\alpha$ <sup>+</sup> CD8<sup>+</sup> T cells from CPI-colitis treated wildtype mice (n=8) or *Il23*<sup>-/-</sup> mice (n=12).
